# Supplementary material for: Correlation between magnetic and micro-structural properties of low energy ion irradiated and un-irradiated Zn0.95Mn0.05O films
Source: Royal Society of Chemistry journal article supplement (doi:10.1039/c6ra25233h), 2017-01-01
Supplement: c6ra25233h1.pdf [file c6ra25233h1.pdf]

Energetic ions when penetrate inside the material lose their energies by two nearly independent processes: (i) electronic energy loss (inelastic collisions with electrons:  $S_e$ ) and (ii) nuclear energy loss (elastic collisions with atomic nuclei:  $S_n$ ).<sup>1,2</sup> Generally, major contribution of the energy transfer comes from  $S_e$  when the velocities of the impinging ions are much greater than the orbital velocity of the K shell electrons bound to the target atoms.<sup>2</sup> As the ions move deeper inside the target, their velocities get reduced and then they suffer elastic collisions ( $S_n$ ) with the target atomic nuclei. However, relative contributions of  $S_e$  and  $S_n$  depend on the projectile mass, velocity, charge state and also on the target itself. The energy losses of 800 keV  $Ar^{4+}$  ions (both  $S_e$  and  $S_n$ ) have been estimated by using stopping power and ranges of ions in matter simulation (SRIM) technique<sup>3</sup> and presented in Figure 1. In SRIM calculation, the density of ZnO was taken as 4 g/cm<sup>3</sup> and the displacement threshold energies were taken as 18.5 eV and 41.4 eV for Zn and O atom respectively in ZnO lattice.<sup>4</sup> Figure 1 represents the variation of  $S_e$  and  $S_n$  against the penetration depth of  $Ar^{4+}$  ions inside the target film. It clearly indicates that the penetration depth is greater than the thickness of the films (~550 nm). The electronic energy loss ( $S_e$ ) largely predominates over nuclear energy loss ( $S_n$ ) as shown in Fig. 1. The energy transfer through  $S_n$  can only knock out the target atoms from their lattice positions and creates stable vacancies or vacancy clusters.<sup>1,5,6</sup> However,  $S_e$  is mostly responsible for the excitation and ionization of the target atoms. Above a certain critical value of  $S_e$  (~keV/nm), point defects or correlated defect clusters may also be produced in insulators.<sup>2</sup> But  $S_e$  for the  $Ar^{4+}$  ions is far less than the critical value responsible for the generation of such defects or defect clusters. SRIM calculation also reveals that  $Ar^{4+}$  ions create more damages at the Zn sites than O sites. However, SRIM can only predict the generated displacements. Majority of these defects immediately gets

compensated (dynamic recovery) inside the target and this is the origin of the radiation hardness of ZnO.<sup>1,7</sup>

## REFERENCES

- 1 B. Angadi, Y. S. Jung, W. K. Choi, R. Kumar, K. Jeong, S. W. Shin, J. H. Lee, J. H. Song, M. W. Khan and J. P. Srivastava, *Appl. Phys. Lett.*, 2006, 88, 142502.
- 2 S. Chattopadhyay, S. Dutta, D. Jana, S. Chattopadhyay, A. Sarkar, P. Kumar, D. Kanjilal, D. K. Mishra and S. K. Ray, *J. Appl. Phys.*, 2010, 107, 113516.
- 3 J. F. Ziegler, J. P. Biersack and U. Littmerk, *Stopping Power and Ranges of Ion in Matter*, 1985, Pergamon Press, New York.
- 4 S. K. Neogi, N. Midya, P. Pramanik, A. Banerjee, A. Bhattacharya, G. S. Taki, J. B. M. Krishna and S. Bandyopadhyay, *J. Magn. Mag. Mats.*, 2012, 408, 217.
- 5 S. K. Neogi, S. Chattopadhyay, Aritra Banerjee, S. Bandyopadhyay, A. Sarkar and R. Kumar, *J. Phys.: Condens. Matter.*, 2011, 23, 205801.
- 6 S. K. Neogi, S. Chattopadhyay, R. Karmakar, Aritra Banerjee, S. Bandyopadhyay and A. Banerjee, *J. Alloy Compd.*, 2013, 573, 76.
- 7 D. C. Look, J. W. Hemsky and J. R. Sizelove, *Phys. Rev. Lett.*, 1999, 82, 2552.

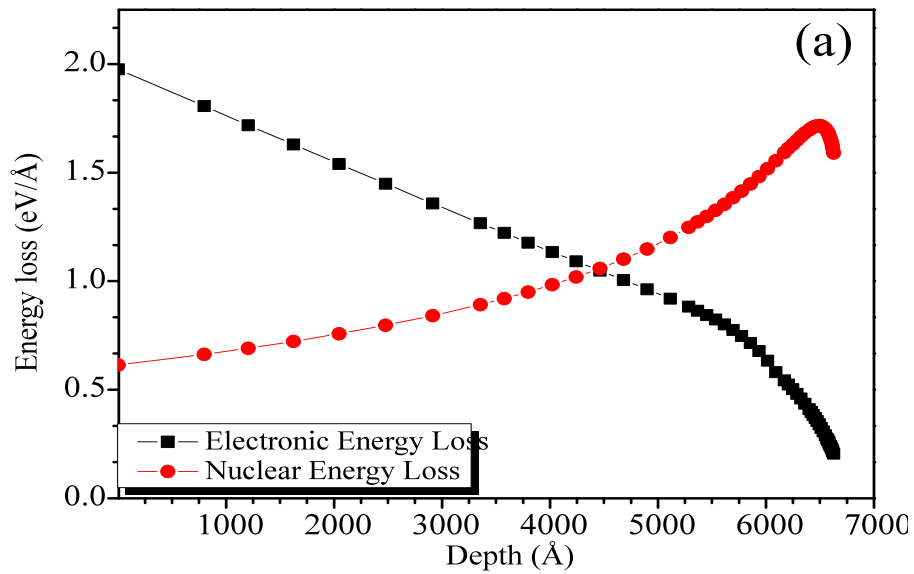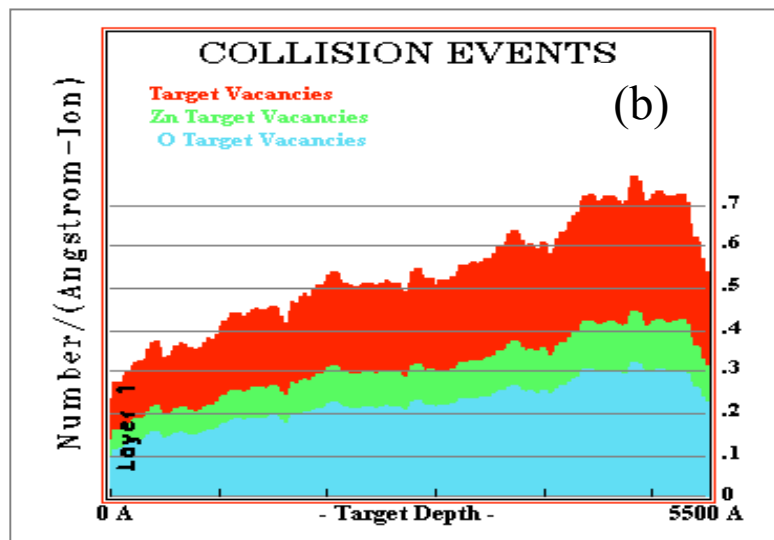

**Fig. 1:** (Color online) (a) Electronic and Nuclear energy losses with penetration depth of 800 keV Ar ions in Zn<sub>0.95</sub>Mn<sub>0.05</sub>O films, calculated from SRIM. (b) Vacancy created by ion beam throughout the depth of the films, calculated from SRIM.
